# Supplementary material for: Spatially confined growth of carbon nanotubes in the pore channels of microporous ceramic supports with improved filtration efficiency
Source: Royal Society of Chemistry journal article supplement (doi:10.1039/d2nr03121c), 2022-01-01
Supplement: d2nr03121c1.pdf [file d2nr03121c1.pdf]

Supplementary Data for

**Spatial Confined Growth of Carbon Nanotubes in Pore Channels of Microporous Ceramic**

**Supports with improved filtration efficiency**

Kai Yuan, Qilin Gu, Feng Zhang, Zhaoxiang Zhong\*, Weihong Xing

State Key Laboratory of Materials-Oriented Chemical Engineering, National Engineering Research

Center for Special Separation Membrane, Nanjing Tech University, Nanjing 210009, China

*\*E-mail: zhongzx@njtech.edu.cn (Zhong Z).*

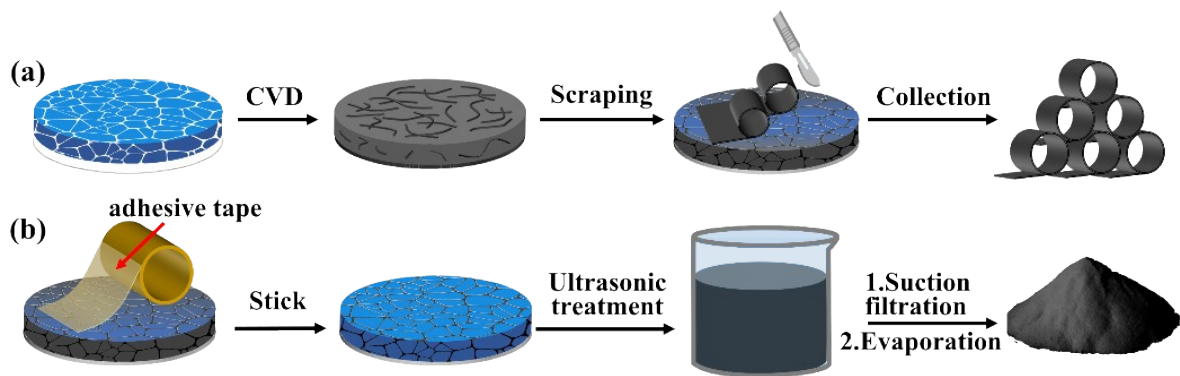

Fig. S1 The collection processes of CNTs samples on different sites of SiC supports for characterization: (a) on the surface, (b) in the pore.

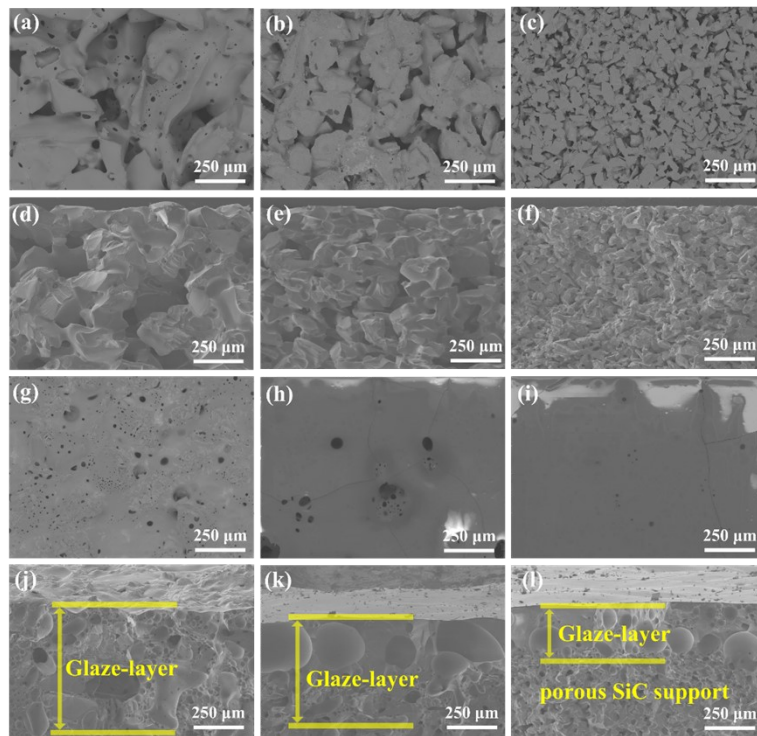

Fig. S2 Surface and Cross-section SEM images of different SiC supports: (a, d) SiC-200, (b, e) SiC-100, (c, f) SiC-50, (g, j) SiC-m200, (h, k) SiC-m100 and (i, l) SiC-m50.

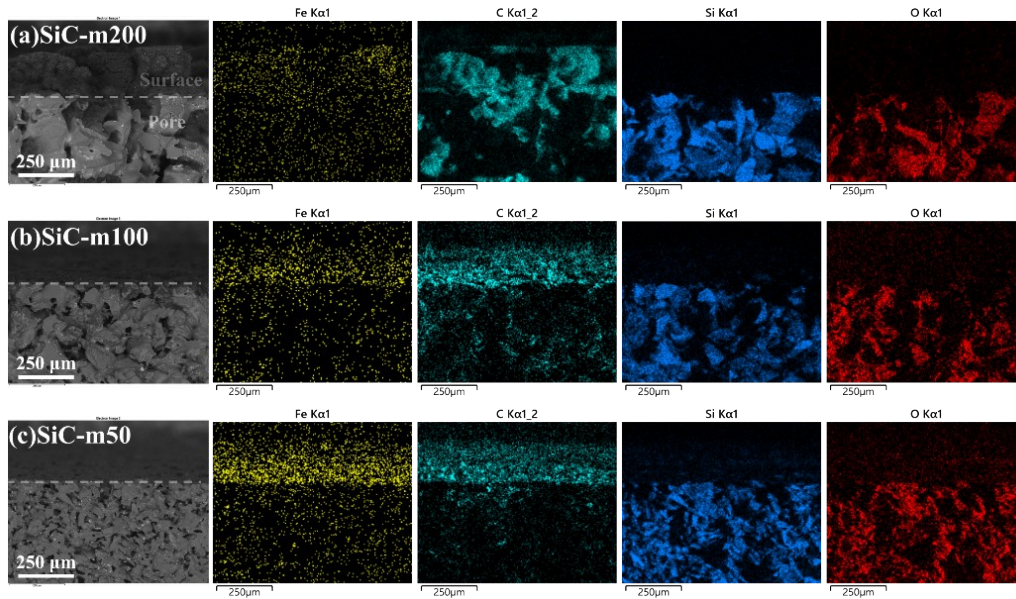

Fig. S3 EDS elements mapping images of Fe, C, Si and O elements from different SiC supports: (a) SiC-m200, (b) SiC-m100 and (c) SiC-m50.

A series of the following reactions will occur in the quartz tube:

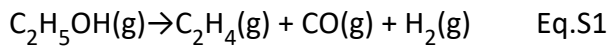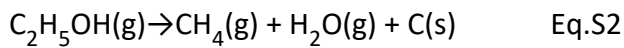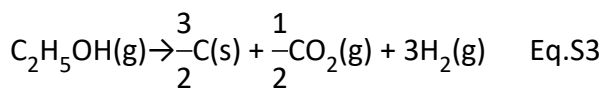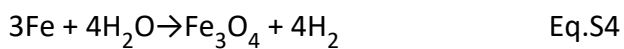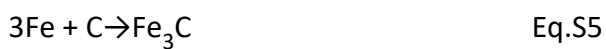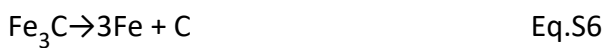

Fe atoms originate from the decomposition of ferrocene<sup>1</sup>. The reactions of ethanol in tube furnace are listed in Eq. S1-S3<sup>2,3</sup>. From Eq. S4, Fe<sub>3</sub>O<sub>4</sub> impurities outside of CNTs from catalyst deactivation can be attributed to the oxidation reaction of Fe with H<sub>2</sub>O. While the formation processes of Fe and Fe<sub>3</sub>C particles inside of CNTs from catalyst decomposition are shown in Eq. S5-S6<sup>4</sup>.

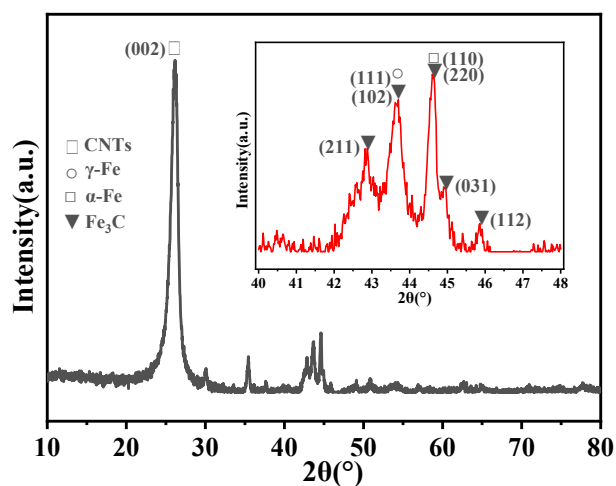

Fig. S4 XRD pattern of CNTs powers collected from the pore channels of the SiC-100 support.

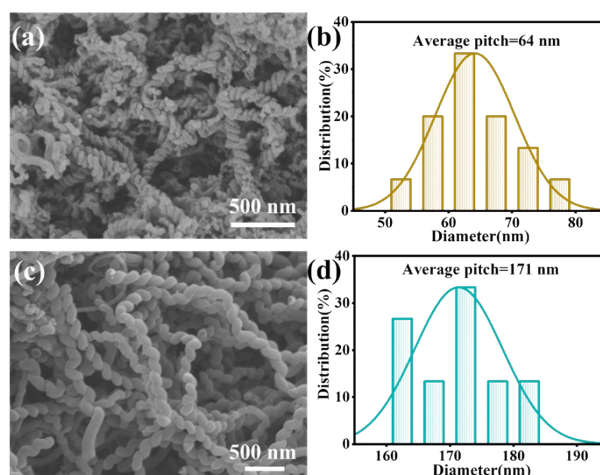

Fig. S5 (a) SEM images and (b) the pitch distribution of S-CNTs on the surface of SiC-m200 support, (c) SEM images and (d) the pitch distribution of S-CNTs in the pore channels of SiC-m200 support.

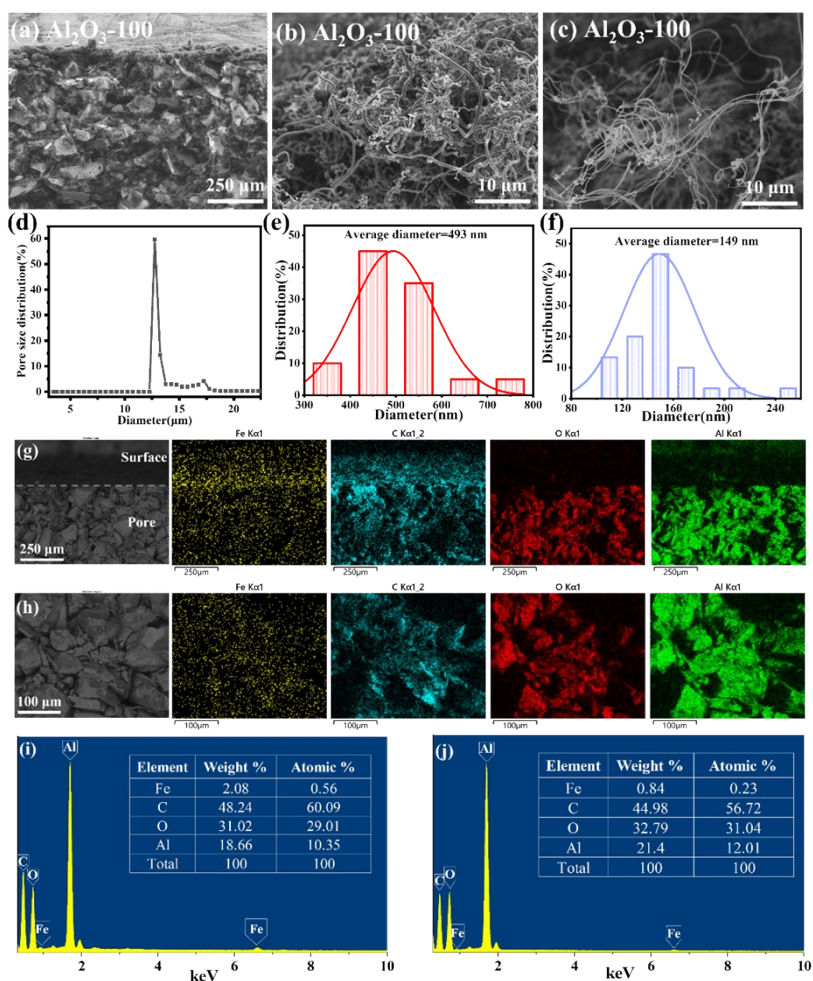

Fig. S6 Characterization results of CNTs on Al<sub>2</sub>O<sub>3</sub>-m100 support: (a) cross-section SEM image, SEM image of CNTs on the surface (b) and in the pore (c), (d) pore size distribution of Al<sub>2</sub>O<sub>3</sub> support, CNTs diameter distribution (e) on the surface and (f) in the pore, EDS elements mapping and spectrum of (g) & (i) the top cross-section and (g) & (i) pore of Al<sub>2</sub>O<sub>3</sub>

## References

1. H. Hou, A. K. Schaper, F. Weller and A. Greiner, *Chem mater*, 2002, 14, 3990-3994.
2. S. D. Shandakov, A. V. Kosobutsky, M. S. Rybakov, O. G. Sevostyanov, D. M. Russakov, M. V. Lomakin, A. I. Vershinina and I. M. Chirkova, *Carbon*, 2018, 126, 522-531.
3. H. Sugime and S. Noda, *Carbon*, 2012, 50, 2953-2960.
4. A. Schneider, *Corrosion Science*, 2002, 44, 2353-2365.
